# Supplementary material for: The efficacy and safety of micropulse transscleral laser treatment in glaucoma: a systematic review and meta-analysis
Source: Springer Nature journal article supplement (doi:10.1186/s12886-023-03017-w), 2023-06-12

## Supplement

**Figure 1. Meta-analysis of mTLT comparing to CW-TSCPC in baseline IOP.** A total of 113 patients treated with mTLT and 225 patients treated with CW-TSCPC was included. The baseline IOP in CW-TSCPC group was higher than that in mTLT group (WMD=-0.31, 95% CI -0.55 to -0.08).

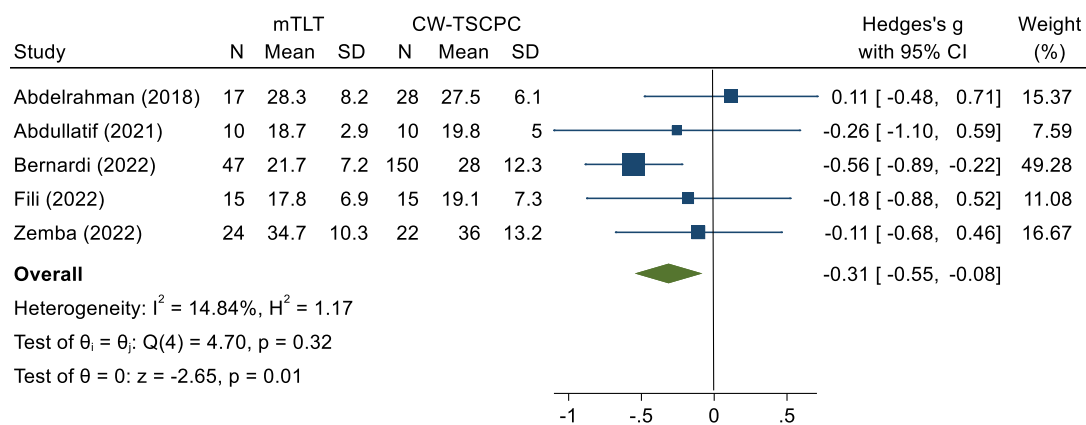

Fixed-effects inverse-variance model

**Figure 2. Meta-analysis of post- and pre-operative NOAM in mTLT at various visits.** A total of 103 patients treated with mTLT was included. The IOP significantly reduced at 1-2 weeks, 3, and 6 months (WMD=-0.35, 95% CI -0.66 to -0.04; WMD=-0.51, 95% CI -0.91 to -0.11; WMD=-0.59, 95% CI -0.77 to -0.22, respectively) after mTLT treatment.

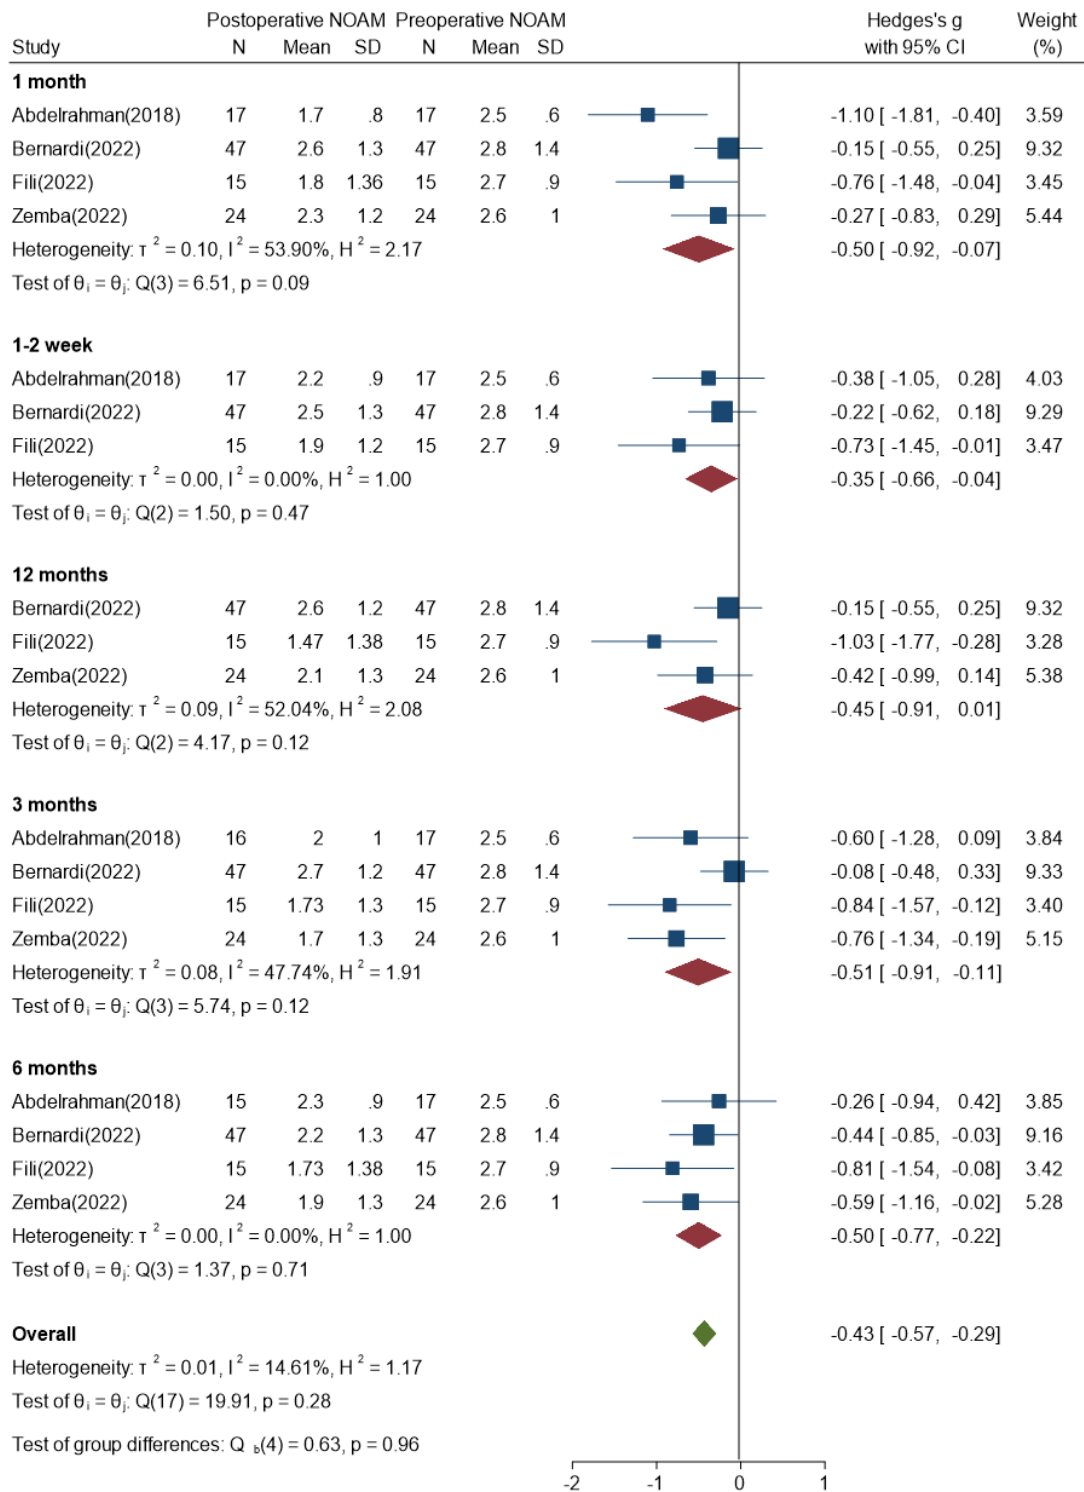

Random-effects DerSimonian–Laird model

**Figure 3. Meta-analysis of mTLT comparing to CW-TSCPC in baseline NOAM.** A total of 103 patients treated with mTLT and 215 patients treated with CW-TSCPC was included. No significant difference was observed between these two modalities of laser treatment (WMD=-0.06, 95% CI -0.30 to 0.18).

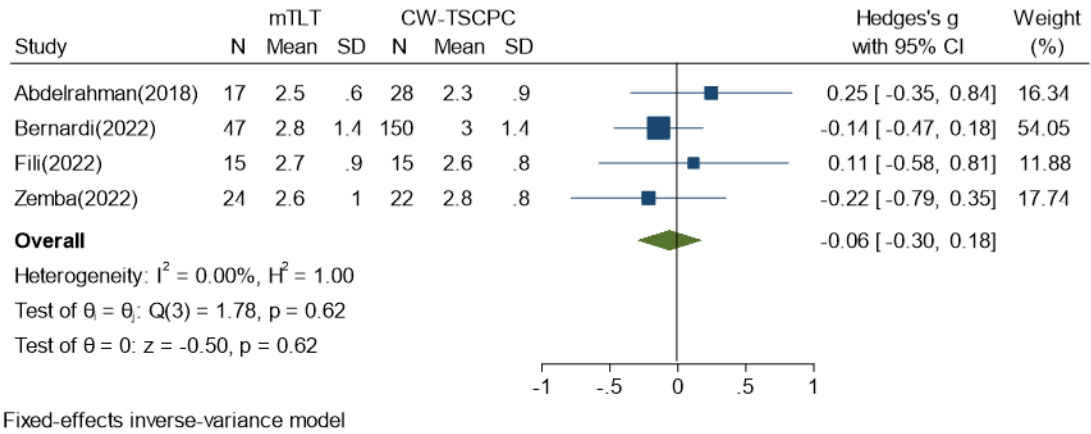

**Figure 4. Filled funnel plot of NOAM before and after mTLT.**

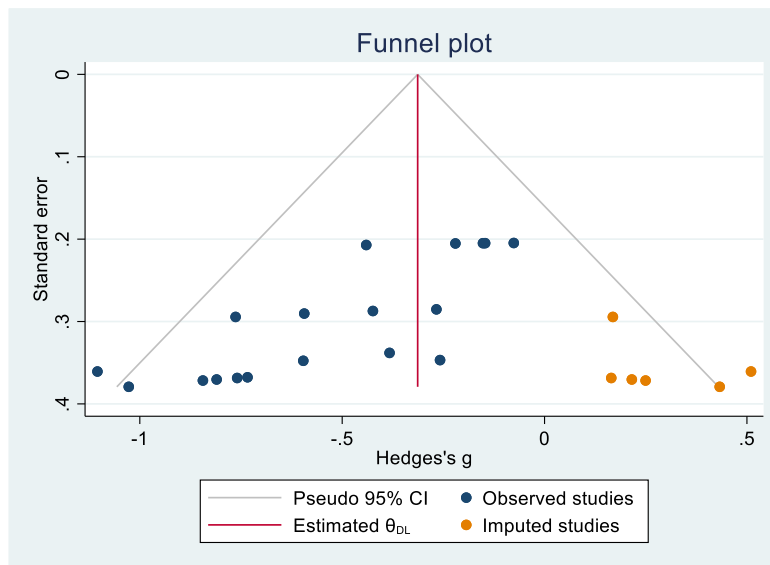

Supplement: MOESM3 [file 25477224]
